# Supplementary material
Source: publisher figshare collection journal article supplement (https://acs.figshare.com/ndownloader/files/3599691)
Supplement: Supplementary file 1 [file 3599691]

Supporting Information:  
IR and NIR absorption spectroscopy of  $C_{60}^{2+}$   
and  $C_{60}^{3+}$  in Neon Matrixes.

Bastian Kern, Dmitry Strelnikov, Patrick Weis, Artur Böttcher,  
and Manfred M. Kappes

Institute of Physical Chemistry, KIT,  
Fritz-Haber-Weg 2, 76131 Karlsruhe, Germany

## Contents

| Page  |                                                                                                               |
|-------|---------------------------------------------------------------------------------------------------------------|
| S2-S4 | IR absorptions of $C_{60}^{2+/+/0}$ in Ne+0.15%CCl <sub>4</sub> and Ne+1%CO <sub>2</sub> matrixes             |
| S5    | DFT IR spectra of $C_{60}^{2+}$ in different symmetries vs. experiment                                        |
| S6    | UV spectra of $C_{60}^{+}$ , $C_{60}^{2+}$ , $C_{60}$ in Ne+1%CO <sub>2</sub> matrixes in ratios as indicated |
| S7    | UV absorption spectra of ionized and neutral $C_{60}$ as predicted by TDDFT calculations                      |

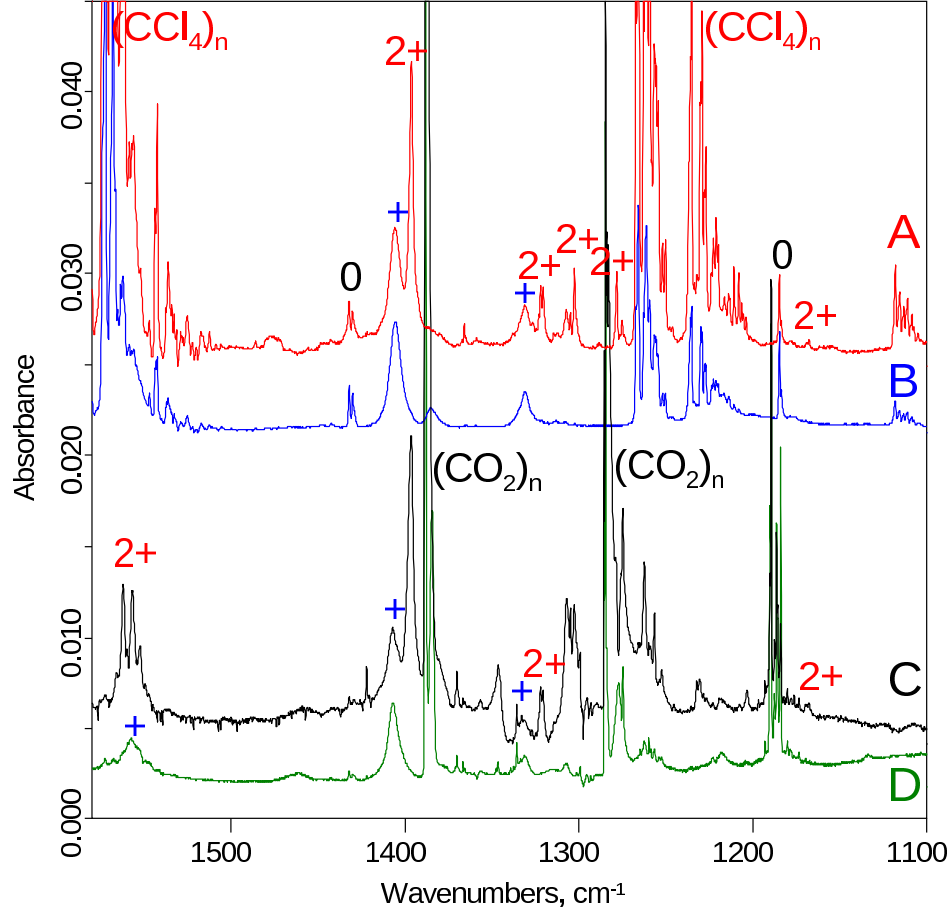

Figure 1: IR absorption spectra obtained upon depositing  $C_{60}^{2+}$  (A,C) and  $C_{60}^+$  (B,D) in Ne+0.15%  $CCl_4$  (A,B) and Ne+1%  $CO_2$  (C,D) matrixes at 5 K. Spectra A and C were scaled to have similar  $C_{60}^{2+}$  absorption strengths. Furthermore, spectrum B was scaled to A so as to have similar  $C_{60}^+$  absorption strengths (as was spectrum D to C). **A**: Ne+0.15%  $CCl_4$  matrix containing  $C_{60}^{2+/+/0}$  (red), **B**: Ne+0.15%  $CCl_4$  matrix containing  $C_{60}^{+/0}$  (blue), **C**: Ne+1%  $CO_2$  matrix containing  $C_{60}^{2+/+}$  (black), **D**: Ne+1%  $CO_2$  matrix containing  $C_{60}^+$  (green).

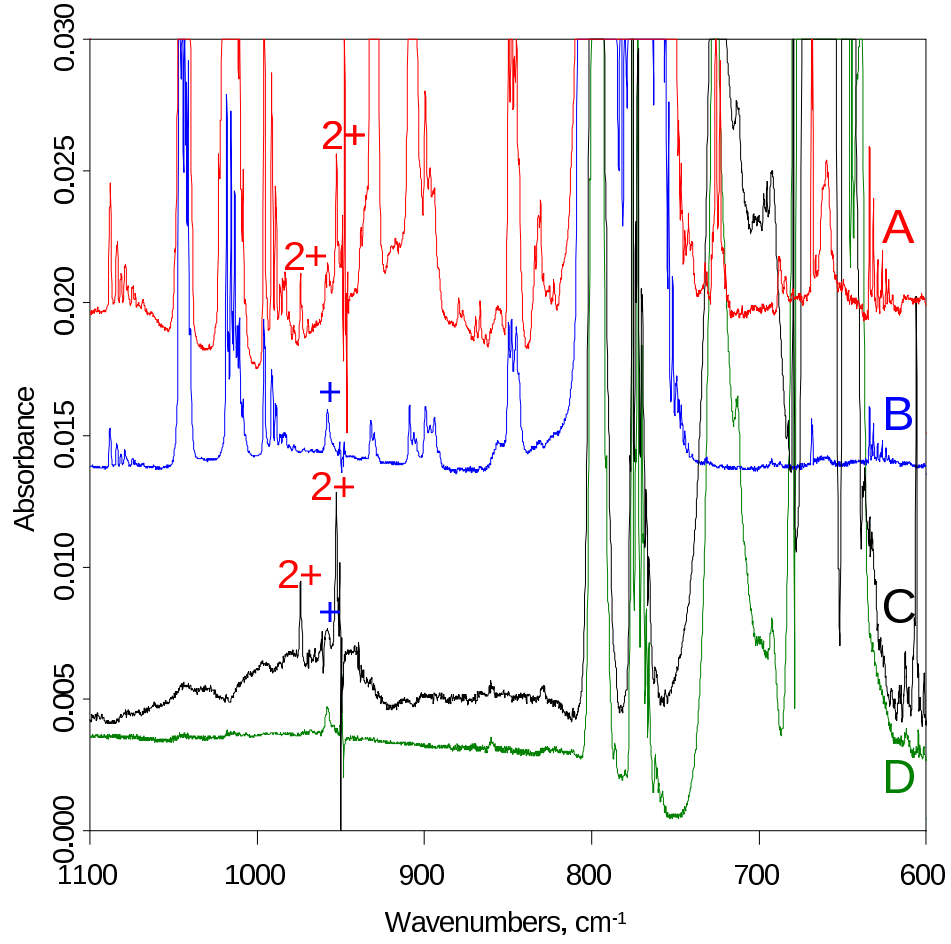

Figure 2: IR absorption spectra obtained upon depositing  $C_{60}^{2+}$  and  $C_{60}^{+}$  in Ne+0.15%  $CCl_4$  and Ne+1% $CO_2$  matrixes at 5 K. Spectra A and C were scaled to have similar intensities of  $C_{60}^{2+}$  absorptions. Spectra A and B, as well as C and D were pairwise scaled to have similar intensities of  $C_{60}^{+}$  absorptions. **A**:  $C_{60}^{2+/+}$  in Ne+0.15%  $CCl_4$  (red), **B**:  $C_{60}^{+}$  in Ne+0.15%  $CCl_4$  (blue), **C**:  $C_{60}^{2+/+}$  in Ne+1% $CO_2$  (black), **D**:  $C_{60}^{+}$  in Ne+1% $CO_2$  (green).

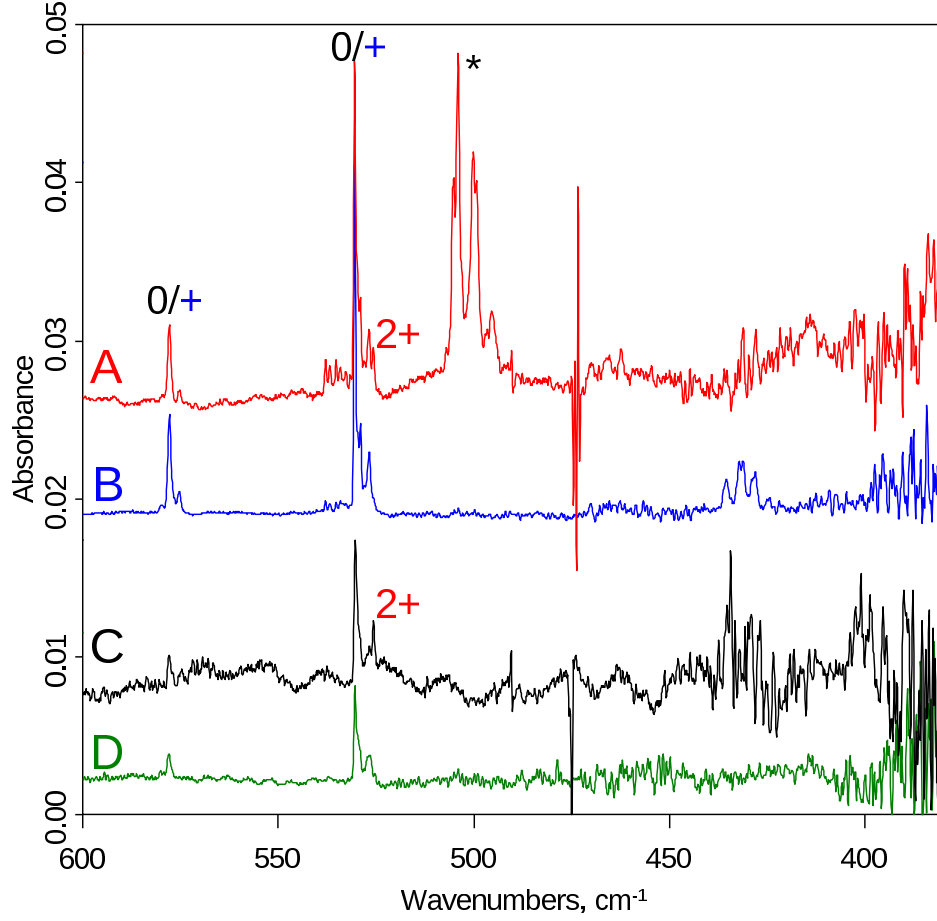

Figure 3: IR absorption spectra of  $C_{60}^{2+}$  (A,C) and  $C_{60}^{+}$  (B,D) deposited in Ne+0.15%  $CCl_4$  (A,B) and Ne+1%  $CO_2$  (C,D) matrixes at 5 K. Spectra A and C were scaled to have similar intensities of  $C_{60}^{2+}$  absorptions. Spectra A and B, as well as C and D were pairwise scaled to have similar intensities of  $C_{60}^{+}$  absorptions. The feature labeled by an asterisk was assigned to  $Cl_2CCl \cdot Cl$  [Lugez, C. L.; Jacox, M. E.; Johnson, R. D. J. Chem. Phys. 1998, 109, 7147–7156], however its appearance only in matrixes containing  $C_{60}^{2+}$  suggests that it is due to  $(CCl_4)_n CCl_3^{+}$  or  $(CCl_4)_n CCl_4^{+}$ . **A**:  $C_{60}^{2+/+}$  in Ne+0.15%  $CCl_4$  (red), **B**:  $C_{60}^{+}$  in Ne+0.15%  $CCl_4$  (blue), **C**:  $C_{60}^{2+/+}$  in Ne+1%  $CO_2$  (black), **D**:  $C_{60}^{+}$  in Ne+1%  $CO_2$  (green).

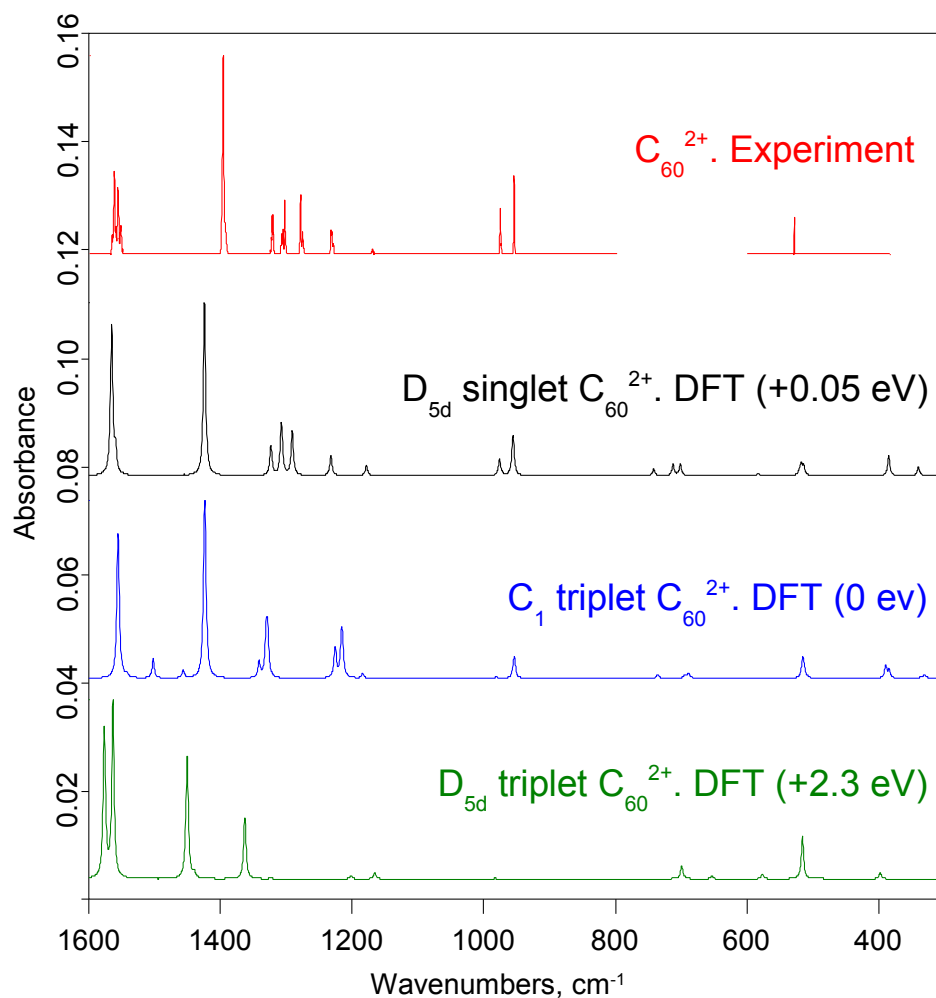

Figure 4: RI-DFT BP86/def2-SV(P) calculated spectra of  $C_{60}^{2+}$  in different ground state symmetries and multiplicities in comparison to the extracted experimental IR absorption spectrum (in Ne matrix). Calculated absorption lines were broadened by Lorentz functions having fwhm of  $4 \text{ cm}^{-1}$  to best match experimental data, frequencies are unscaled. Calculated relative energies of the ground state are in brackets.

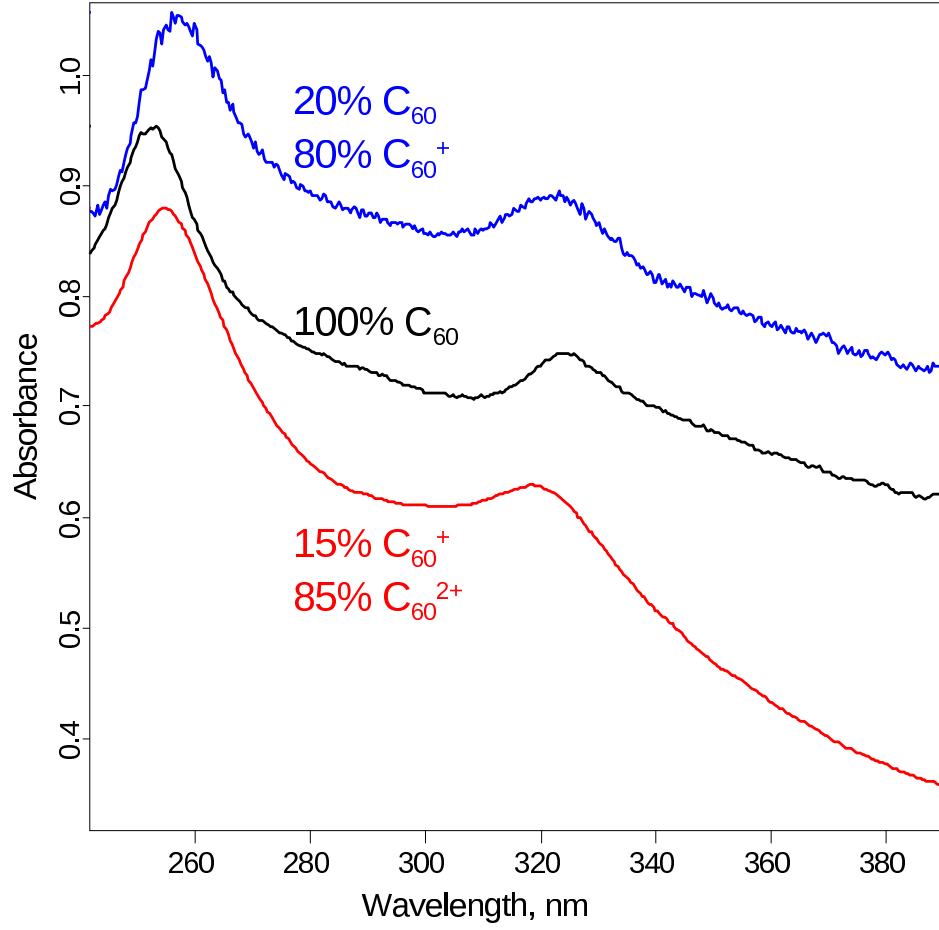

Figure 5: UV absorption spectra of  $C_{60}^+$ ,  $C_{60}^{2+}$ ,  $C_{60}$  in Ne+1%CO<sub>2</sub> matrixes at 5 K in various ratios as indicated. The amount of  $C_{60}^+/C_{60}^{2+}/C_{60}$  was estimated from corresponding IR spectra.  $C_{60}^-$  is present in negligible amounts, if at all.

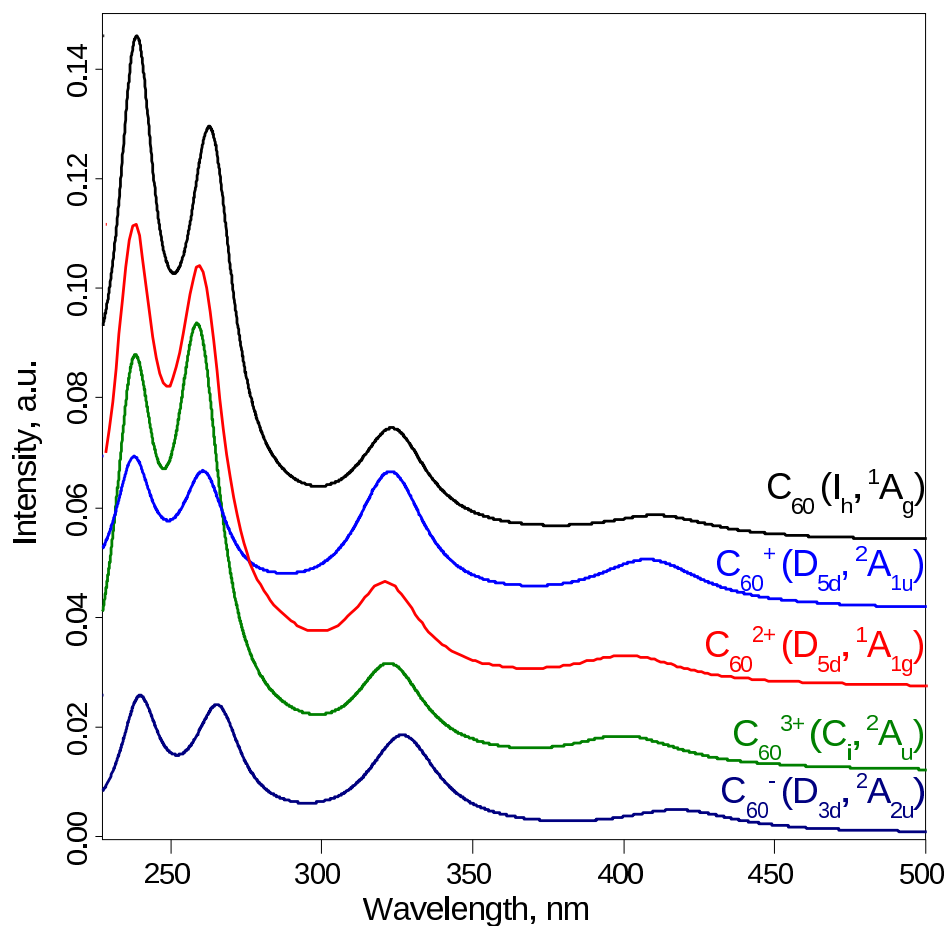

Figure 6: TDDFT calculated spectra of ionized and neutral  $C_{60}$ . The molecular symmetry groups and corresponding ground states are indicated in brackets. To fit the experimental Ne matrix data, calculated absorptions were broadened by Lorentz functions with fwhm of  $3000\text{ cm}^{-1}$ . Frequencies were scaled by 0.88.
